# Supplementary material for: Network based analyses of gene expression profile of LCN2 overexpression in esophageal squamous cell carcinoma
Source: PubMed Central journal article supplement — Sci Rep. 2014 Jun 23;4:5403. doi: 10.1038/srep05403 (PMC4066265; doi:10.1038/srep05403), 2014-06-23
Supplement: srep05403-s1.pdf [file srep05403-s1.pdf]

# **Network based analyses of gene expression profile of *LCN2* overexpression in esophageal squamous cell carcinoma**

Bingli Wu<sup>1\*</sup>, Chunquan Li<sup>1,2\*</sup>, Zepeng Du<sup>3</sup>, Qianlan Yao<sup>4</sup>, Jianyi Wu<sup>1</sup>, Li Feng<sup>4</sup>, Pixian Zhang<sup>1</sup>, Shang Li<sup>2</sup>, Liyan Xu<sup>5</sup>, Enmin Li<sup>1</sup>

<sup>1</sup> Department of Biochemistry and Molecular Biology, Shantou University Medical College, Shantou515041, China, <sup>2</sup> College of Medical Informatics, Daqing Campus, Harbin Medical University, Daqing163319, China, <sup>3</sup> Department of Pathology, Shantou Central Hospital, Shantou515041, China, <sup>4</sup> College of Bioinformatics Science and Technology, Harbin Medical University, Harbin150081, China, <sup>5</sup> Institute of Oncologic Pathology, Shantou University Medical College, Shantou515041, China,

\*These authors contributed equally to this work

Correspondence and requests for materials should be addressed to L.X. ([lyxu@stu.edu.cn](mailto:lyxu@stu.edu.cn)) or E.L. ([nmli@stu.edu.cn](mailto:nmli@stu.edu.cn)) (Fax: +86-754-88900847; Tel: +86-754-88900413)

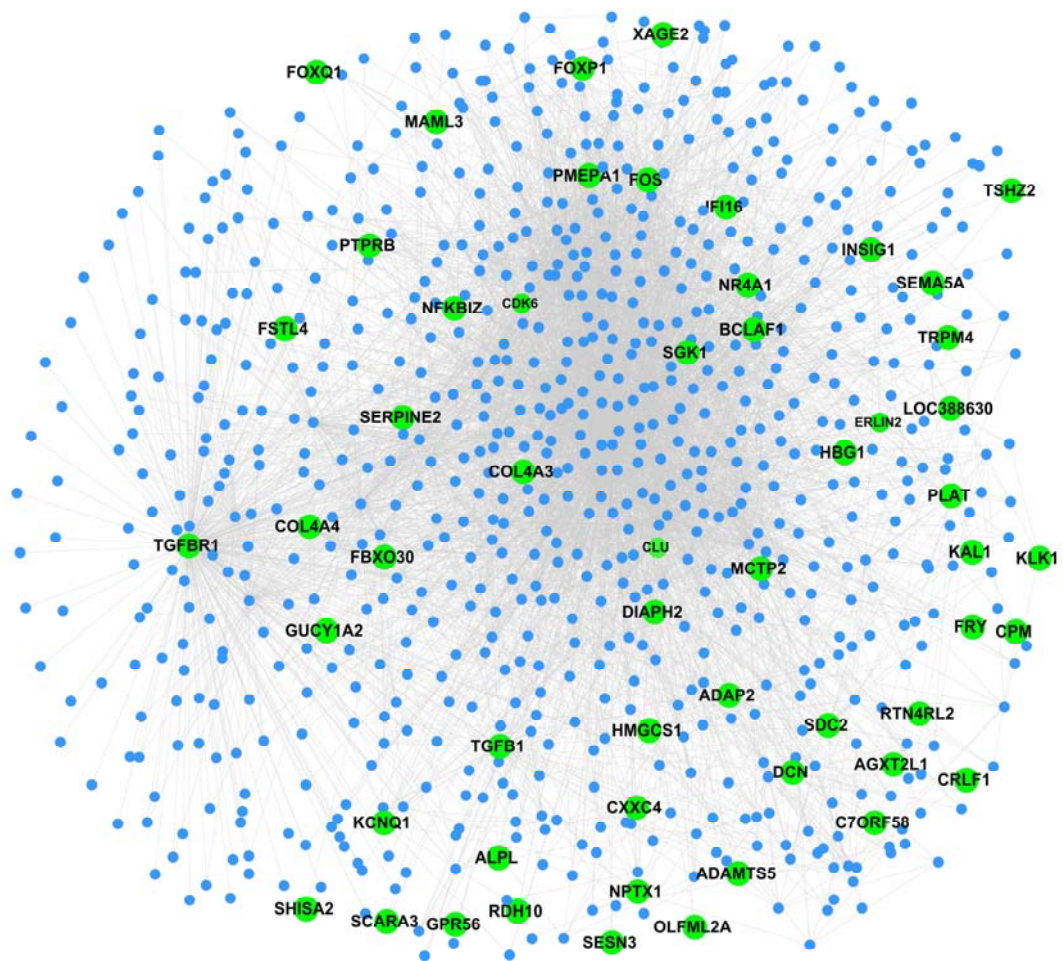

Supplementary Figure S1



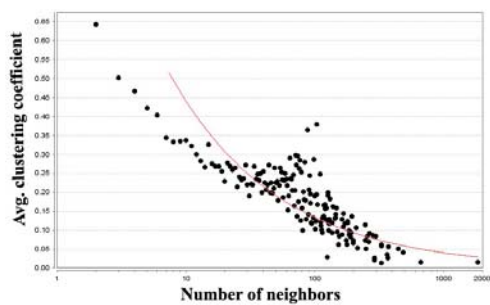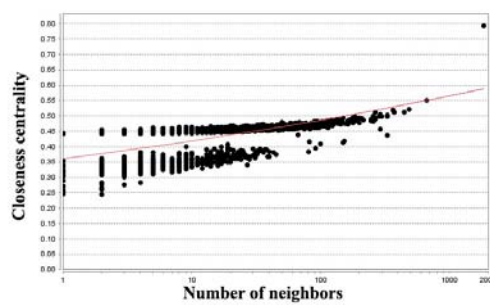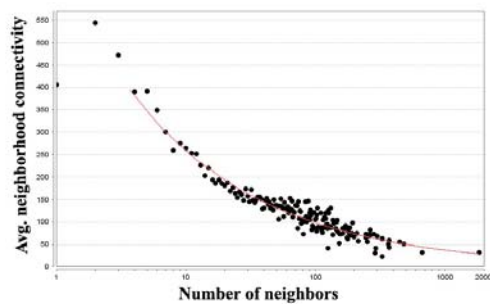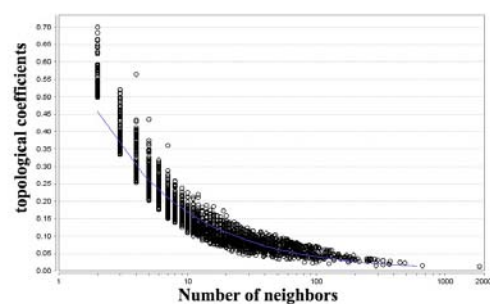

Supplementary Figure S3

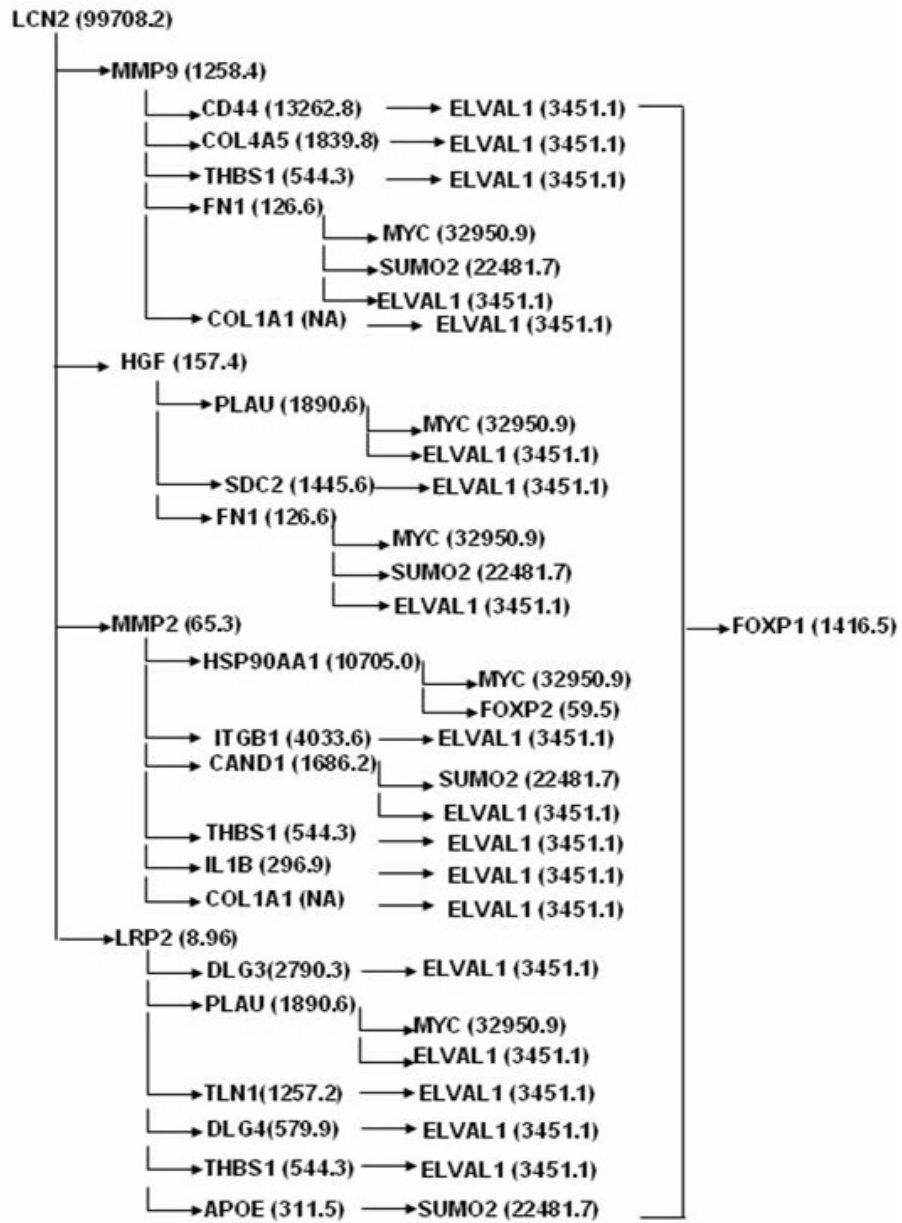

Supplementary Figure S4

**Supplementary Table S1****Differentially expressed genes with ability to translocate from cytoplasm to nucleus.**

| <b>Gene symbol</b> | <b>Full name</b>                        | <b>Expression trend</b> | <b>Reference of translocation from cytoplasm to nucleus</b>                                                                                                                                                                                                                                                     |
|--------------------|-----------------------------------------|-------------------------|-----------------------------------------------------------------------------------------------------------------------------------------------------------------------------------------------------------------------------------------------------------------------------------------------------------------|
| DACH1              | dachshund family transcription factor 1 | Upregulated             | Wu K, Chen K, Wang C, Jiao X, Wang L, Zhou J, Wang J, Li Z, Addya S, Sorensen PH, Lisanti MP, Quong A, Ertel A, Pestell RG. Cell fate factor DACH1 represses YB-1-mediated oncogenic transcription and translation. <i>Cancer Res.</i> 2014;74(3):829-39.                                                       |
| SMAD9              | SMAD family member 9                    | Upregulated             | Heldin CH, Miyazono K, ten Dijke P. TGF-beta signalling from cell membrane to nucleus through SMAD proteins. <i>Nature.</i> 1997;390(6659):465-71.                                                                                                                                                              |
| TP63               | tumor protein p63                       | Upregulated             | Munne PM, Gu Y, Tumiati M, Gao P, Koopal S, Uusivirta S, Sawicki J, Wei GH, Kuznetsov SG. TP53 supports basal-like differentiation of mammary epithelial cells by preventing translocation of deltaNp63 into nucleoli. <i>Sci Rep.</i> 2014;4:4663.                                                             |
| CLU                | clusterin                               | Downregulated           | Mazzarelli P, Pucci S, Spagnoli LG. CLU and colon cancer. The dual face of CLU: from normal to malignant phenotype. <i>Adv Cancer Res.</i> 2009;105:45-61.                                                                                                                                                      |
| FOXP1              | forkhead box P1                         | Downregulated           | Rayoo M, Yan M, Takano EA, Bates GJ, Brown PJ, Banham AH, Fox SB. Expression of the forkhead box transcription factor FOXP1 is associated with oestrogen receptor alpha, oestrogen receptor beta and improved survival in familial breast cancers. <i>J Clin Pathol.</i> 2009;62(10):896-902.                   |
| DISC1              | disrupted in schizophrenia 1            | Downregulated           | Zhou X, Chen Q, Schaukowitch K, Kelsoe JR, Geyer MA. Insoluble DISC1-Boymaw fusion proteins generated by DISC1 translocation. <i>Mol Psychiatry.</i> 2010;15(7):669-72.                                                                                                                                         |
| EGR1               | early growth response 1                 | Downregulated           | Yamamoto C, Basaki Y, Kawahara A, Nakashima K, Kage M, Izumi H, Kohno K, Uramoto H, Yasumoto K, Kuwano M, Ono M. Loss of PTEN expression by blocking nuclear translocation of EGR1 in gefitinib-resistant lung cancer cells harboring epidermal growth factor receptor-activating mutations. <i>Cancer Res.</i> |

|         |                                                            |               |                                                                                                                                                                                                                                                         |
|---------|------------------------------------------------------------|---------------|---------------------------------------------------------------------------------------------------------------------------------------------------------------------------------------------------------------------------------------------------------|
| NR4A1   | nuclear receptor subfamily 4, group A, member 1            | Downregulated | 2010;70(21):8715-25.<br>Renaud J, Chiasson K, Bournival J, Rouillard C, Martinoli MG. 17 $\beta$ -estradiol delays 6-OHDA-induced apoptosis by acting on Nur77 translocation from the nucleus to the cytoplasm. <i>Neurotox Res.</i> 2014;25(1):124-34. |
| FOS     | FBJ murine osteosarcoma viral oncogene homolog             | Downregulated | Chida K, Nagamori S, Kuroki T. Nuclear translocation of Fos is stimulated by interaction with Jun through the leucine zipper. <i>Cell Mol Life Sci.</i> 1999;55(2):297-302.                                                                             |
| CDK6    | cyclin-dependent kinase 6                                  | Downregulated | Nagasawa M, Melamed I, Kupfer A, Gelfand EW, Lucas JJ. Rapid nuclear translocation and increased activity of cyclin-dependent kinase 6 after T cell activation. <i>J Immunol.</i> 1997;158(11):5146-54.                                                 |
| RASGRP3 | RAS guanyl releasing protein 3 (calcium and DAG-regulated) | Downregulated | Okamura SM, Oki-Idouchi CE, Lorenzo PS. The exchange factor and diacylglycerol receptor RasGRP3 interacts with dynein light chain 1 through its C-terminal domain. <i>J Biol Chem.</i> 2006;281(47):36132-9.                                            |
| BCLAF1  | BCL2-associated transcription factor 1                     | Downregulated | Lee YY, Yu YB, Gunawardena HP, Xie L, Chen X. BCLAF1 is a radiation-induced H2AX-interacting partner involved in $\gamma$ H2AX-mediated regulation of apoptosis and DNA repair. <i>Cell Death Dis.</i> 2012;3:e359.                                     |

---

**Supplementary Table S2**  
**Interesting Significant GO terms.**

| <b>Significant<br/>GO list</b>  | <b>Term name</b>                                                                                | <b>P-Value Corrected<br/>with Bonferroni</b> |
|---------------------------------|-------------------------------------------------------------------------------------------------|----------------------------------------------|
| <b>Immunity-related terms</b>   |                                                                                                 |                                              |
| GO:0002253                      | activation of immune response                                                                   | 1.50E-19                                     |
| GO:0050778                      | positive regulation of immune response                                                          | 2.43E-15                                     |
| GO:0045089                      | positive regulation of innate immune response                                                   | 9.95E-11                                     |
| GO:0002684                      | positive regulation of immune system process                                                    | 5.31E-15                                     |
| GO:0002682                      | regulation of immune system process                                                             | 1.36E-22                                     |
| GO:0045087                      | innate immune response                                                                          | 2.62E-22                                     |
| <b>Pathway-related terms</b>    |                                                                                                 |                                              |
| GO:0017015                      | regulation of transforming growth factor beta receptor signaling pathway                        | 8.67E-7                                      |
| GO:0030111                      | regulation of Wnt receptor signaling pathway                                                    | 2.33E-5                                      |
| GO:0030177                      | positive regulation of Wnt receptor signaling pathway                                           | 9.84E-4                                      |
| GO:0030512                      | negative regulation of transforming growth factor beta receptor signaling pathway               | 1.97E-5                                      |
| GO:0090101                      | negative regulation of transmembrane receptor protein serine/threonine kinase signaling pathway | 1.315E-4                                     |
| GO:0042059                      | negative regulation of epidermal growth factor receptor signaling pathway                       | 2.99E-5                                      |
| GO:0042058                      | regulation of epidermal growth factor receptor signaling pathway                                | 5.04E-4                                      |
| GO:0007219                      | Notch signaling pathway                                                                         | 1.98E-7                                      |
| GO:0030518                      | intracellular steroid hormone receptor signaling pathway                                        | 8.34E-12                                     |
| GO:0030521                      | androgen receptor signaling pathway                                                             | 9.89E-8                                      |
| GO:0033143                      | regulation of intracellular steroid hormone receptor signaling pathway                          | 8.44E-5                                      |
| <b>Cell cycle related terms</b> |                                                                                                 |                                              |
| GO:0000075                      | cell cycle checkpoint                                                                           | 5.99E-15                                     |
| GO:0000080                      | G1 phase of mitotic cell cycle                                                                  | 2.57E-43                                     |
| GO:0000082                      | G1/S transition of mitotic cell cycle                                                           | 1.08E-14                                     |
| GO:0000086                      | G2/M transition of mitotic cell cycle                                                           | 1.24E-4                                      |
| GO:0000087                      | M phase of mitotic cell cycle                                                                   | 1.07E-8                                      |
| GO:0000216                      | M/G1 transition of mitotic cell cycle                                                           | 3.42E-5                                      |
| GO:0000278                      | mitotic cell cycle                                                                              | 3.15E-25                                     |
| GO:0006977                      | DNA damage response, signal transduction by p53 class mediator resulting in cell cycle arrest   | 1.41E-8                                      |
| GO:0007050                      | cell cycle arrest                                                                               | 1.48E-17                                     |
| GO:0007093                      | mitotic cell cycle checkpoint                                                                   | 3.16E-15                                     |
| GO:0007346                      | regulation of mitotic cell cycle                                                                | 2.26E-15                                     |
| GO:0010564                      | regulation of cell cycle process                                                                | 8.85E-16                                     |



|                                           |                                                                                         |          |
|-------------------------------------------|-----------------------------------------------------------------------------------------|----------|
| GO:0022402                                | cell cycle process                                                                      | 8.89E-27 |
| GO:0022403                                | cell cycle phase                                                                        | 3.11E-23 |
| GO:0031571                                | mitotic cell cycle G1/S transition DNA damage checkpoint                                | 2.66E-9  |
| GO:0045786                                | negative regulation of cell cycle                                                       | 2.38E-18 |
| GO:0045787                                | positive regulation of cell cycle                                                       | 2.39E-4  |
| GO:0051436                                | negative regulation of ubiquitin-protein ligase activity involved in mitotic cell cycle | 5.58E-13 |
| GO:0051437                                | positive regulation of ubiquitin-protein ligase activity involved in mitotic cell cycle | 2.63E-13 |
| GO:0051439                                | regulation of ubiquitin-protein ligase activity involved in mitotic cell cycle          | 2.25E-13 |
| GO:0051726                                | regulation of cell cycle                                                                | 3.31E-26 |
| GO:0071156                                | regulation of cell cycle arrest                                                         | 1.12E-13 |
| GO:0071158                                | positive regulation of cell cycle arrest                                                | 7.18E-11 |
| GO:0072474                                | signal transduction involved in mitotic cell cycle G1/S checkpoint                      | 1.41E-8  |
| GO:0090068                                | positive regulation of cell cycle                                                       | 5.10E-11 |
| GO:2000602                                | regulation of interphase of mitotic cell cycle                                          | 1.38E-10 |
| <b>Cellular response-related terms</b>    |                                                                                         |          |
| GO:0071219                                | cellular response to molecule of bacterial origin                                       | 6.35E-6  |
| GO:0071216                                | cellular response to biotic stimulus                                                    | 1.06E-7  |
| <b>Extracellular matrix-related terms</b> |                                                                                         |          |
| GO:0030198                                | extracellular matrix organization                                                       | 1.72E-5  |

---

## Supplementary Text S1

**1) Closeness centrality** determines how “close” a node is to other nodes in a network by measuring the sum of the shortest distances (geodesic paths) between that node and all other nodes in the network.

**2)** The connectivity of a node is the number of its neighbors. The neighborhood connectivity of a node  $n$  is defined as the average connectivity of all neighbors of  $n$ . The **neighborhood connectivity distribution** gives the average of the neighborhood connectivities of all nodes  $n$  with  $k$  neighbors for  $k = 0, 1, \dots$ .

**3) Topological coefficient** is a relative measure for the extent to which a node shares neighbors with other nodes.

**4) Average clustering coefficient distribution** gives the average of the clustering coefficients for all nodes  $n$  with  $k$  neighbors for  $k = 2, \dots$ . NetworkAnalyzer also computes the network clustering coefficient that is the average of the clustering coefficients for all nodes in the network.
